# Supplementary material for: Pak1 and PP2A antagonize aPKC function to support cortical tension induced by the Crumbs-Yurt complex
Source: eLife journal article supplement (doi:10.7554/elife.67999), 2021-07-02

④ Yif

15-17 FG,  $\alpha$ PKC, Pac6,  $Pac^{myr}$  OK

$Pac^{myr}$  +/- Canth bean

st 11-13  $\bar{\alpha}$  conclure

FG aussi  
shp2a aussi (de  $\bar{\alpha}$ )

201207

$\alpha$ -Yif 96p

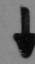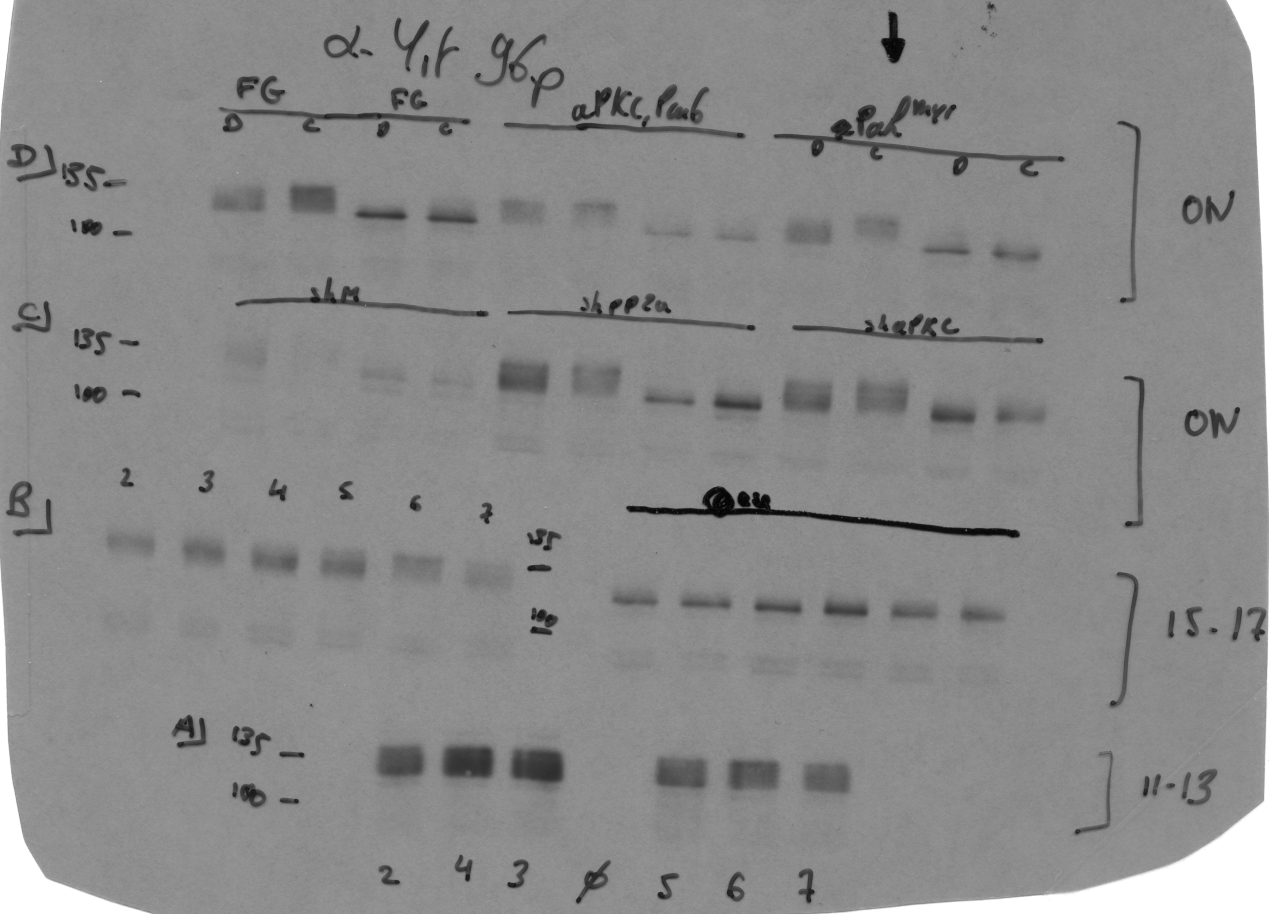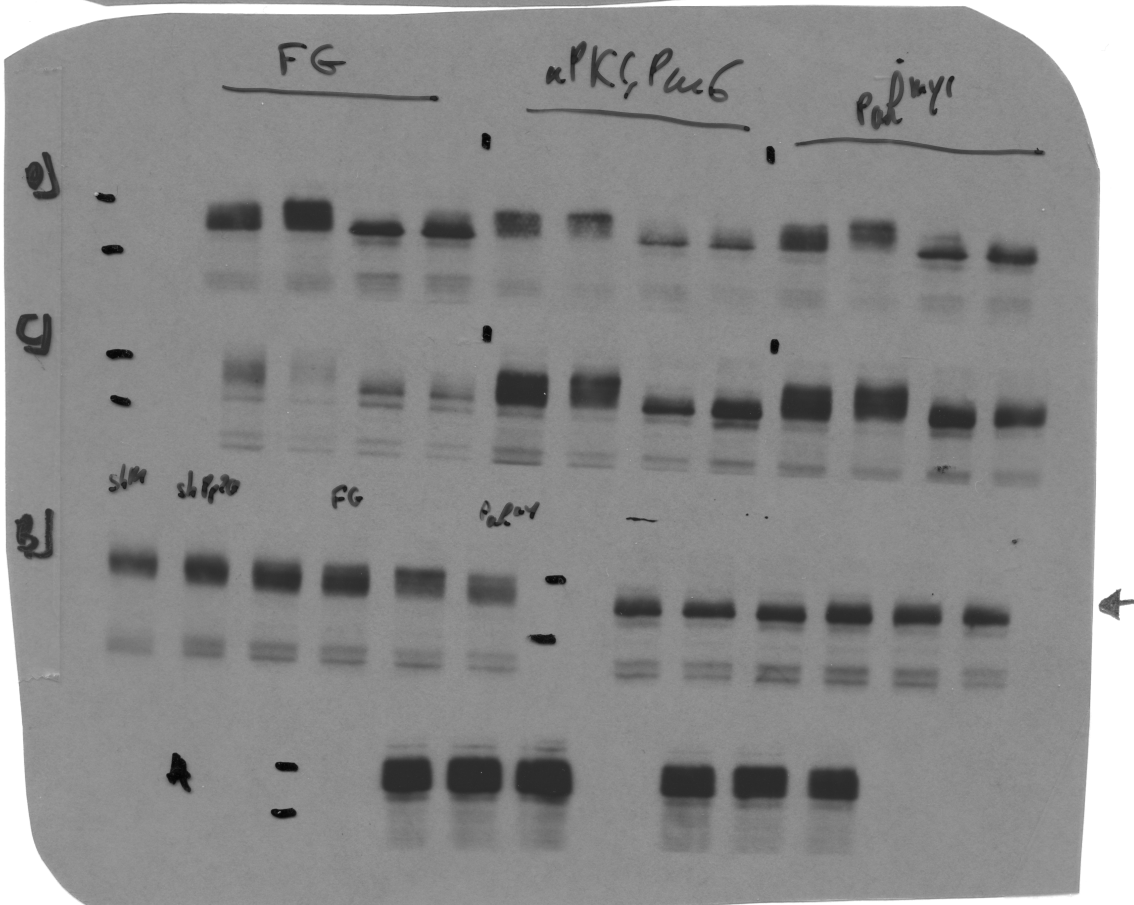

Supplement: fig7-data4 [file elife-67999-fig7-data4-v2.pdf]
