# Supplementary material for: Pak1 and PP2A antagonize aPKC function to support cortical tension induced by the Crumbs-Yurt complex
Source: eLife journal article supplement (doi:10.7554/elife.67999), 2021-07-02

$\beta$  tub E7 1/2000

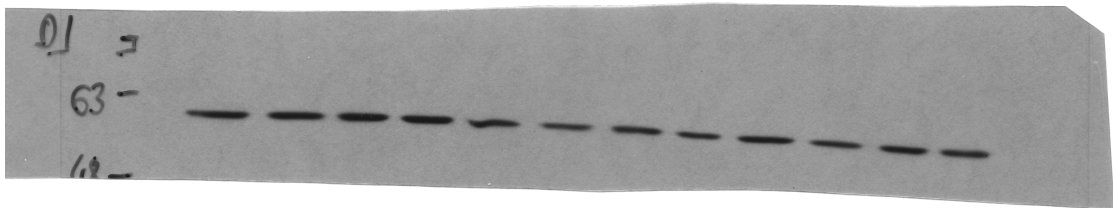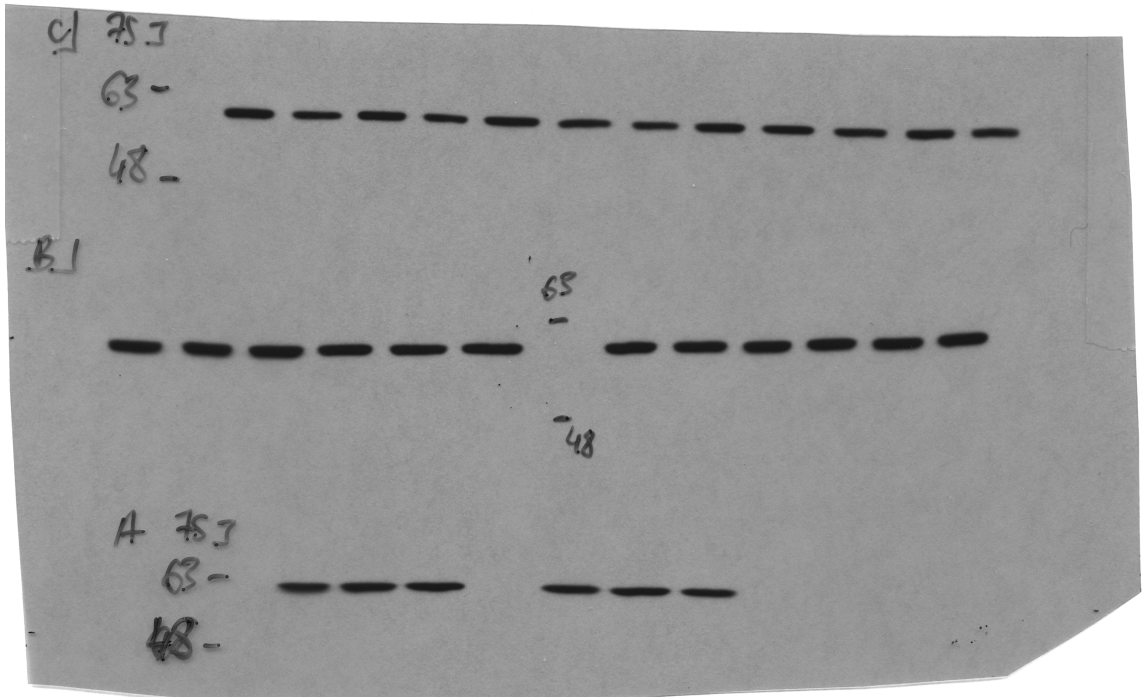

Supplement: fig7-data5 [file elife-67999-fig7-data5-v2.pdf]
