# Supplementary material for: Pak1 and PP2A antagonize aPKC function to support cortical tension induced by the Crumbs-Yurt complex
Source: eLife journal article supplement (doi:10.7554/elife.67999), 2021-07-02

Figure 7-C

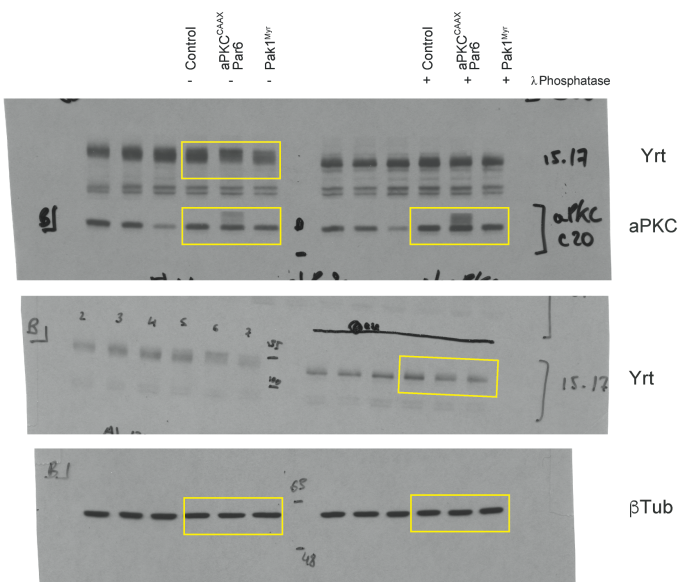

Figure 7-D

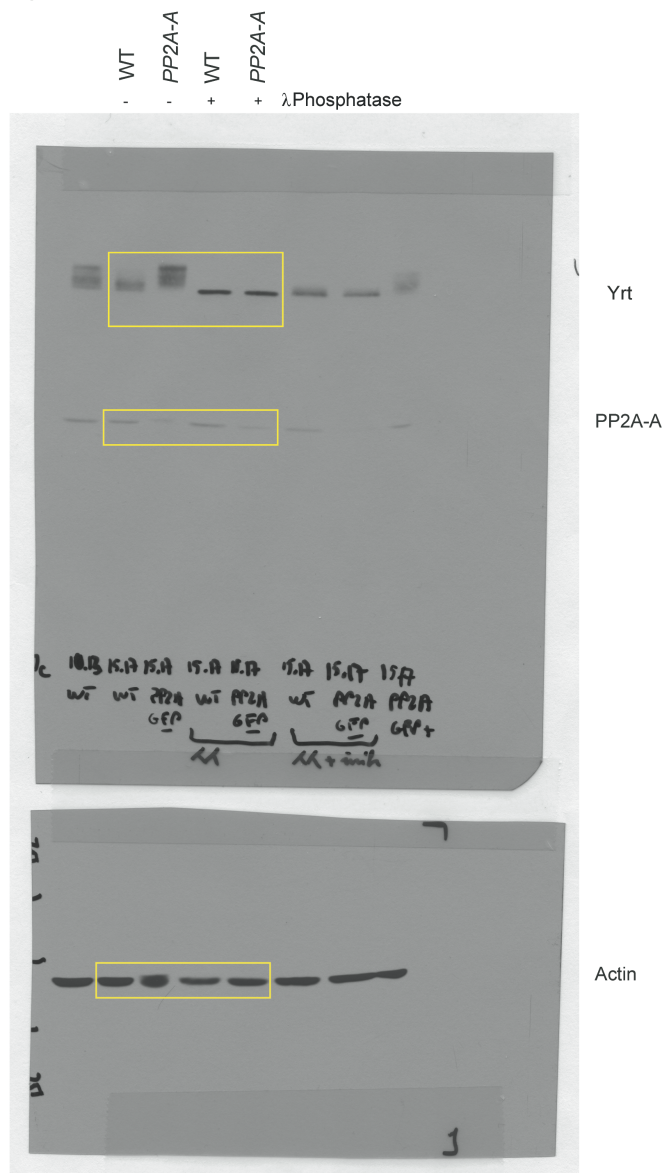

Figure 7-E, F

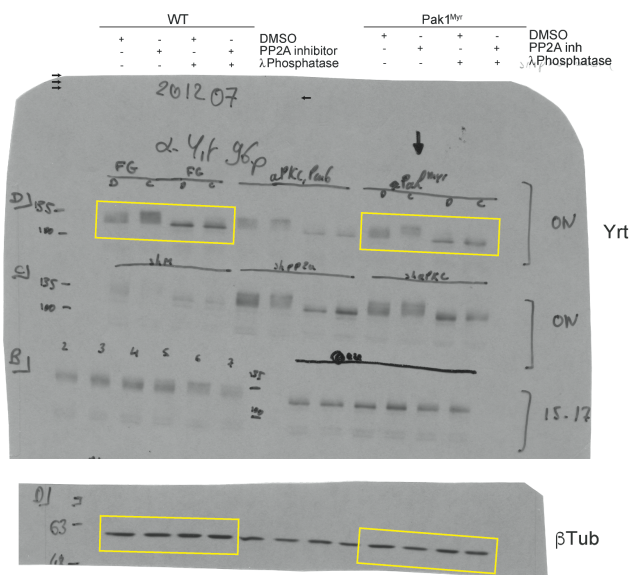

Supplement: fig7-data6 [file elife-67999-fig7-data6-v2.pdf]
