# Supplementary material for: Pak1 and PP2A antagonize aPKC function to support cortical tension induced by the Crumbs-Yurt complex
Source: eLife. 2021 Jul 2;10:e67999. doi: 10.7554/eLife.67999 (PMC8282337; doi:10.7554/eLife.67999)
Supplement: Figure 1—source data 1. — Raw data for Figure 1B and D. [file elife-67999-fig1-data1.xlsx]

## Sheet: Feuil1
Figure 1-source data
Figure 1-B				Figure 1-D
Retraction velocity (μm/s)	sh mCherry	sh yrt		Retraction velocity (μm/s)	control	FLAG-Yrt
	0.76935	0.30594			0.57393	0.77842
	0.4807	0.22987			0.62636	1.0641
	0.8057	0.30411			0.69344	0.75844
	0.45897	0.35864			0.62749	0.72624
	1.072	0.45873			0.68677	0.64168
	0.84547	0.30556			0.5361	1.0061
	0.30566	0.22801			0.76556	0.99887
	0.45807	0.24229			0.76628	0.55786
	0.69059	0.30536			0.57844	1.2465
	0.46903	0.22902			0.36705	0.61672
	0.77256	0.15197			0.42466	0.61208
	0.30612	0.3323			0.54142	1.0722
	0.31278				0.46505
	0.46572
	0.53693
	0.53545
	0.35975
