# Supplementary material for: Pak1 and PP2A antagonize aPKC function to support cortical tension induced by the Crumbs-Yurt complex
Source: eLife. 2021 Jul 2;10:e67999. doi: 10.7554/eLife.67999 (PMC8282337; doi:10.7554/eLife.67999)
Supplement: Figure 2—source data 1. — Raw data for Figure 2A–D. [file elife-67999-fig2-data1.xlsx]

## Sheet: Feuil1
Figure 2-source data
Figure 2-C				Figure 2-D
Mean intensity (a.u.)	sh mCherry (stage 13)	sh yrt (stage 13)		Mean intensity (a.u.)	sh mCherry (stage 14)	sh yrt (stage 14)
	1979.9	2281.6			2486.8	2156.8
	2449.5	2477.6			2169.9	2002
	2313.3	1991.7			1695.4	2547.2
	1886.5	2410.7			2404.5	2499.4
	2267.7	2271.9			2228.6	2079.1
	1635.1	1676.7			2300	1844.3
	1789.4	2311.9			1874.2	1904.4
		1713.2			2784.7	2051.8
		2284.4			1570.3	2259.4
Signal Heterogeneity	0.041945	0.048478			2426.7	2018.3
	0.043855	0.050057			1950.7	2200.8
	0.048496	0.035259			2411.2
	0.05176	0.059578			2023.3
	0.058164	0.053155			2625.1
	0.057127	0.058951		Signal Heterogeneity	0.083999	0.043279
	0.044443	0.051467			0.10142	0.046987
		0.071529			0.076374	0.048938
		0.057566			0.07994	0.047125
					0.089241	0.064423
					0.051345	0.060192
					0.077899	0.062309
					0.06068	0.035589
					0.062909	0.049725
					0.051784	0.076415
					0.063035	0.046626
					0.11083
					0.078524
					0.089853
