# Supplementary material for: Pak1 and PP2A antagonize aPKC function to support cortical tension induced by the Crumbs-Yurt complex
Source: eLife. 2021 Jul 2;10:e67999. doi: 10.7554/eLife.67999 (PMC8282337; doi:10.7554/eLife.67999)
Supplement: Figure 2—source data 2. — Raw data for Figure 2F. [file elife-67999-fig2-data2.xlsx]

## Sheet: Feuil1
Figure 2-F
Fluorescence intensy ratio (clones/controls)	Control	FLAG-Yrt
	0.848999	1.10783
	1.01927	1.65707
	1.16484	1.78564
	0.964763	1.78141
	0.992572	1.9583
	1.00767	1.36503
	0.971494	1.50174
	1.3955	1.58677
	0.824397	1.46738
	0.939577	1.10114
	1.07298	1.27198
	0.835954	0.749956
	0.935673	1.44183
	1.42477	1.30682
	0.954981	1.56781
	1.04532	1.56781
	0.910004	1.12021
	0.969744	1.64999
		0.947964
