# Supplementary material for: Pak1 and PP2A antagonize aPKC function to support cortical tension induced by the Crumbs-Yurt complex
Source: eLife. 2021 Jul 2;10:e67999. doi: 10.7554/eLife.67999 (PMC8282337; doi:10.7554/eLife.67999)
Supplement: Figure 3—source data 1. — Raw data for Figure 3B,D,F. [file elife-67999-fig3-data1.xlsx]

## Sheet: Feuil1
Figure 3-source data
Figure 3-B				Figure 3-D				Figure 3-F
Apical domain width ratio (clones/controls)	FLAG-GFP	FLAG-Yurt		Apical domain width ratio (clones/controls)	Control	FLAG-Yrt		Apical domain width ratio (clones/controls)	sh sqh	FLAG-Yrt ; sh control	FLAG-Yrt ; sh sqh
	1.15925	0.391319			1.0886	0.652404			1.03521	0.660364	1.01557
	1.15204	0.405868			1.25	0.519987			1.18994	0.799691	0.789568
	0.813331	0.358449			0.929874	0.684334			1.92643	0.661415	0.753272
	0.992929	0.390403			1.18481	0.715255			1.00386	0.486986	0.766809
	0.87223	0.466488			0.957622	0.803181			1.09789	0.733703	0.775067
	1.11274	0.255184			0.894088	0.400896			0.852857	0.856513	0.775067
	1.10136	0.810416			0.880497	0.811478			1.05969	0.725013	0.906552
	1.05951	0.623388			0.846376	0.711979			1.03915	0.58387	1.38707
	0.817263	0.530807			0.941235	0.623852			0.594683	0.573342	1.13648
	1.35153	0.232774			0.946346	1.06045			0.796761	0.554103	0.934203
	1.35518	0.515863			1.24751	0.507211			0.933449	0.695686	1.32483
	0.957005	0.689363			1.03557	0.636421			1.14979	0.608973	1.02539
	1.00077	0.562403			1.08725	0.493705			0.991552	0.582789	0.71424
		0.56815			1.39161	0.567912			0.870303	0.725773	1.30486
		0.282666			1.28074	0.594639			1.55048	0.488879	1.10698
					0.941192	0.697222			1.90473	0.8498	0.923841
					0.597462	0.800107			0.832783	0.691968	1.3213
					1.13297	0.521048			0.864608	0.736764	1.3898
					1.40678	0.679949			1.02475	0.467976	1.07149
					1.09987	0.603547			1.30427	0.804114	1.0074
					1.05442	0.781071			1.99849
					0.840902	0.602406
					1.05022	1.02557
