# Supplementary material for: Pak1 and PP2A antagonize aPKC function to support cortical tension induced by the Crumbs-Yurt complex
Source: eLife. 2021 Jul 2;10:e67999. doi: 10.7554/eLife.67999 (PMC8282337; doi:10.7554/eLife.67999)
Supplement: Figure 5—source data 1. — Raw data for Figure 5H,J. [file elife-67999-fig5-data1.xlsx]

## Sheet: Feuil1
Figure 5-source data
Figure 5-F				Figure 5-H					Figure 5-J
Apical Yrt intensity (A.U.)	control	Crb[Y10A]		Apical domain width ratio (clones/controls)	crb[11a22]	FLAG-Yrt[5A]	FLAG-Yrt[5A] ; crb[11a22]		Apical domain width ratio (clones/controls)	FLAG-Yrt[5A]	FLAG-Yrt[5A], Crb[Y10A]
	2357.14	1082.53			1.14858	0.838655	1.22041			0.696169	1.13484
	992.869	1024.4			0.783237	0.976328	1.05863			0.565592	0.872102
	2392.38	914.371			1.24386	0.538495	0.916778			0.711067	1.13054
	3518.75	1428.85			1.00232	0.610398	1.19068			0.343204	0.916893
	2287.88	1982.85			1.43338	0.456933	1.18937			0.519517	1.44552
	3394.64	2373.55			1.27097	0.775931	0.746633			0.469697	1.03837
	2195.34	1413.94			1.12459	0.61161	0.724779			0.410553	1.10542
	2598.43	785.231			1.58262	0.670394	1.50961			0.656776	0.970162
	2700.03	1533.39			1.39444	0.616915	0.80132			0.411826	0.713934
	2348.03	1467.26			1.1542	0.59379	0.827386			0.412342	0.928931
	2387.24	1294.23			1.28297	0.664142	1.13382			0.563173	1.00811
	1690.09	759.605			0.816609	0.94091	1.29512			0.581563	1.03526
	904.383	1017.86			1.23836	0.877486	1.34218			0.430226	0.878468
	1018.04	1025.62			1.18921	0.500477	1.21737			0.747613	1.00541
					1.77975	0.62621	1.33078			0.496218	1.34261
					1.47256	0.847671	0.74987			0.520859	0.875761
					0.927173	0.985897	1.10661
					0.929583	0.930007
					1.24877	0.73149
