# Supplementary material for: Pak1 and PP2A antagonize aPKC function to support cortical tension induced by the Crumbs-Yurt complex
Source: eLife. 2021 Jul 2;10:e67999. doi: 10.7554/eLife.67999 (PMC8282337; doi:10.7554/eLife.67999)
Supplement: Figure 6—source data 1. — Raw data for Figure 6B,D. [file elife-67999-fig6-data1.xlsx]

## Sheet: Feuil1
Figure 6-source data
Figure 6-B				Figure 6-D
Apical domain width ratio (clones/controls)	sh moe (H2O)	sh moe (aPKC inh.)		Apical domain width ratio (clones/controls)	myc-Moe[T559D]	FLAG-Yrt	myc-Moe[T559D] ; FLAG-Yrt
	1.2922	0.659941			1.25234	0.492778	1.24009
	0.72476	1.38564			0.962387	0.780035	0.932934
	1.0755	0.54554			1.04492	0.882767	0.769924
	1.05107	0.716355			0.861583	0.865365	0.764199
	0.992322	0.737536			0.935421	0.326836	1.16578
	0.817151	0.552478			1.15866	0.882883	0.597981
	1.46602	0.540866			1.01474	0.667072	0.988557
	1.62336	0.790956			1.10554	0.756488	0.87495
	1.03886	0.599109			0.903092	0.670532	0.79906
	1.40865	0.781308			1.07225	0.745744	1.21399
	1.49756	0.455249			1.65151	0.871687	0.776708
	1.05212	0.781742			0.877685	0.560249	1.12798
	1.03513	0.696784			1.11101	0.35466	1.13574
	0.75225	0.959738			1.05103	0.497433	0.967465
	1.07735	0.468186			0.960631	0.711097	1.02947
		0.949377			0.995181	0.562336
					1.12904	0.714152
					0.933223	0.689639
					0.951176	0.685547
						0.701982
