# Supplementary material for: Pak1 and PP2A antagonize aPKC function to support cortical tension induced by the Crumbs-Yurt complex
Source: eLife. 2021 Jul 2;10:e67999. doi: 10.7554/eLife.67999 (PMC8282337; doi:10.7554/eLife.67999)
Supplement: Figure 7—source data 1. — Raw data for Figure 7B. [file elife-67999-fig7-data1.xlsx]

## Sheet: Feuil1
Figure 7-source data
Figure 7-B
Quantification of lateral Yrt staining intensity in genotypes described in A
Lateral Yrt intensity ratio (clones/controls)	control	aPKC[CAAX], Par6	Pak[Myr]	Pak[Myr] ; aPKC[CAAX], Par6
	1.06675	0.640639	0.957612	0.811352
	1.19365	0.833031	1.13175	1.33275
	1.07038	0.636319	1.12164	1.30611
	1.00443	0.967092	0.98875	0.928349
	0.88411	0.62971	1.23988	1.12701
	0.956049	0.644518	0.856887	1.1738
	1.08602	0.768642	1.09116	1.24523
	1.41305	0.551052		1.14194
	0.841053	0.643568		0.816803
	1.09997	0.561248		0.927856
	1.00276	0.739803		1.03965
	1.17256	0.557555		1.15383
	0.965654	0.678902		1.35937
	1.02298	0.706102
	0.920338	0.78437
