# Supplementary material for: Pak1 and PP2A antagonize aPKC function to support cortical tension induced by the Crumbs-Yurt complex
Source: eLife. 2021 Jul 2;10:e67999. doi: 10.7554/eLife.67999 (PMC8282337; doi:10.7554/eLife.67999)
Supplement: Figure 8—source data 1. — Raw data for Figure 8B,D,F,H. [file elife-67999-fig8-data1.xlsx]

## Sheet: Feuil1
Figure 8-source data
Figure 8-B				Figure 8-D							Figure 8-F						Figure 8-H
Quantification of the apical diameter of cells expressing transgenes indicated in cells line 4. Results are expressed as the ratio between the width of cells expressing the transgenes and the width of wild-type cells in the same follicle				Quantification of the diameter of cells expressing the exogenous proteins described in cells line 4. Results were calculated as a ratio between transgene expressing cells and control cells within the same follicle							Quantification of the apical diameter of cells expressing transgenes indicated in cells line 4. Results are expressed as the ratio between the width of cells expressing the transgenes and the width of wild-type cells in the same follicle						Quantification of the apical diameter of cells expressing transgenes indicated in cells line 4. Results are expressed as the ratio between the width of cells expressing the transgenes and the width of wild-type cells in the same follicle
Apical domain width ratio (clones/controls)	FLAG-Yrt (DMSO)	FLAG-Yrt (Pak1 inh.)		Apical domain width ratio (clones/controls)	sh Pak1	FLAG-Yrt	FLAG-Yrt ; sh Pak1	FLAG-Yrt[5A]	FLAG-Yrt[5A] ; sh Pak1		Apical domain width ratio (clones/controls)	FLAG-Yrt (DMSO)	FLAG-Yrt (PP2A inh.)	FLAG-Yrt[5A] (DMSO)	FLAG-Yrt[5A] (PP2A inh.)		Apical domain width ratio (clones/controls)	sh PP2A	FLAG-Yrt	FLAG-Yrt ; sh PP2A	FLAG-Yrt[5A]	FLAG-Yrt[5A] ; sh PP2A
	0.394301	0.839179			1.1033	0.660364	1.06209	0.893867	0.430523			1.07608	1.15404	0.515797	0.570053			0.942916	0.660364	0.812073	0.893867	0.413293
	0.533587	1.02457			1.15976	0.799691	0.886594	0.668953	0.492188			1.16811	0.859852	0.727179	1.16245			1.38415	0.799691	1.02078	0.668953	0.538686
	0.705474	0.909615			1.12033	0.661415	0.930333	0.402469	0.496784			1.07465	0.839583	0.520072	0.504037			0.79148	0.661415	1.04649	0.402469	0.796153
	0.522943	1.2231			0.779747	0.486985	1.09337	0.791947	0.644139			0.904465	0.927777	0.483995	0.599511			1.06391	0.486985	0.880912	0.791947	0.50725
	0.925863	0.859186			0.823529	0.733703	0.749833	0.593273	0.372909			1.45712	1.03076	0.401294	0.845486			0.884399	0.733703	1.25453	0.593273	0.641988
	0.683681	0.75827			1.06486	0.856513	1.15513	0.503219	0.46646			0.933371	1.08646	0.4537	0.34476			0.81617	0.856513	0.996407	0.503219	0.694714
	0.486165	1.36797			0.969042	0.725013	0.878121	0.519467	0.630378			0.921879	1.07544	0.811798	0.465073			1.16074	0.725013	1.03575	0.519467	0.314232
	0.503353	1.29003			1.20597	0.58387	1.14647	0.74501	0.476817			1.10992	1.15853	0.529313	0.316327			1.08686	0.58387	1.09974	0.74501	0.709189
	0.534077	1.0377			0.94797	0.573342	1.18252	0.657434	0.402714			1.02767	1.1917	0.454896	0.592204			1.01696	0.573342	1.14801	0.657434	0.487858
	0.61031	0.832428			1.05333	0.554103	1.08624	0.431719	0.751626			0.978476	0.864853	0.574797	0.340015			0.970646	0.554103	0.806612	0.431719	0.591067
	0.537437	1.00363			0.869711	0.695686	0.984528	0.470524	0.490275			0.983639	0.949906	0.506603	0.63314			1.04656	0.695686	0.967315	0.470524	0.754577
	0.644935	1.05998			1.21106	0.608973	1.02661	0.537721	0.460803			1.01346	0.96836	0.762471	0.343045			0.973305	0.608973	0.498776	0.537721	0.570835
	0.753486	0.977189			0.943131	0.582789	0.724824	0.728465	0.488754			1.16483	1.06306		0.498843			1.28128	0.582789	0.687832	0.728465	0.392474
	0.852787	0.829557			0.989855	0.725773	1.30774	0.688214	0.614724			0.942466	0.931662		0.618554			0.983367	0.725773	0.897189	0.688214	0.867408
	0.633529	1.18877			0.768838	0.488879	1.07108	0.902119	0.781892			1.03242	0.856911		0.449193			1.03652	0.488879	1.1716	0.902119	0.625741
	0.686066	0.805591			1.32546	0.8498	1.09077	0.55048	0.778602			0.857201	0.98002					1.07235	0.8498	1.20443	0.55048	0.528097
	0.704062	0.664179			1.00469	0.691968	0.861152	0.834526	0.375394			1.03458	0.98002					0.91318	0.691968	1.03605	0.834526	0.705742
	0.630703	1.12177			1.22389	0.736764	1.19581	0.646062	0.471819			0.700112	1.1211					1.07108	0.736764	1.10424	0.646062	0.456789
	0.535601	0.889008				0.467976	0.637767	0.602912	0.551104			1.0981	1.23107						0.467976	0.741161	0.602912	0.553588
	0.394274					0.804114		0.399651											0.804114		0.399651
	0.896716
