# Supplementary material for: Pak1 and PP2A antagonize aPKC function to support cortical tension induced by the Crumbs-Yurt complex
Source: eLife journal article supplement (doi:10.7554/elife.67999), 2021-07-02
Supplement: supp [file elife_poa_e67999_Figure_7_source_data_3.pdf › elife_poa_e67999_Figure_7_source_data_3.pdf]

# Expression de Yunt dans mutant PP2A.A

18 Feb 201

Triage des  $\Phi$  stage 15-17 PP2A.A point 6h40  $\rightarrow$  16h

lyse Tris 1% + PMSF + DOLA + NEM NaB NiCo + TSA

50  $\mu$ g par chaque échantillon

Traitement R & L Phosphatase 1h à 30°C

Sepol

|       |       |       | L Phosphatase |       | L Ph + inhib |       |       |
|-------|-------|-------|---------------|-------|--------------|-------|-------|
| WT    | WT    | PP2A  | WT            | PP2A  | WT           | PP2A  | PP2A  |
| 10-13 | 15-17 | 15-17 | 15-17         | 15-17 | 15-17        | 15-17 | 15-17 |

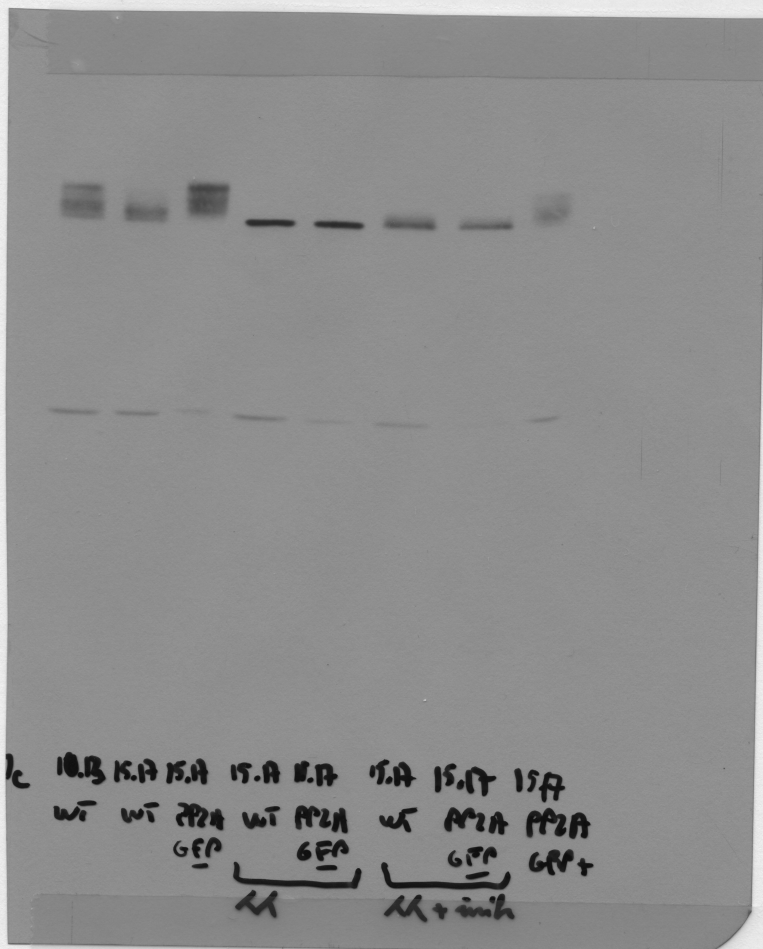

WB Yunt 96

1/10000

WB PP2A 1/5000

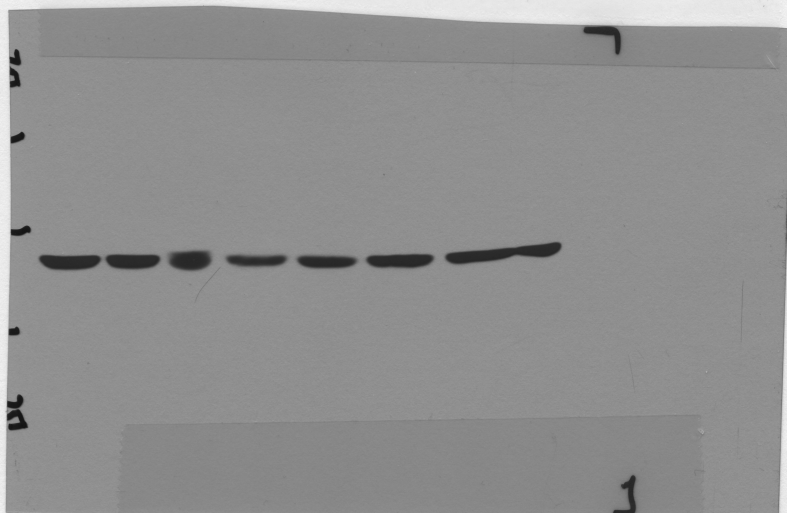

WB Actin

1/2500
